# Supplementary material for: A dynamic analysis of muscle fusion in the chick embryo
Source: Oxford University Press journal article supplement (doi:10.1242/dev.114546), 2014-09-02
Supplement: dev114546_supp.pdf [file dev114546_supp.pdf]

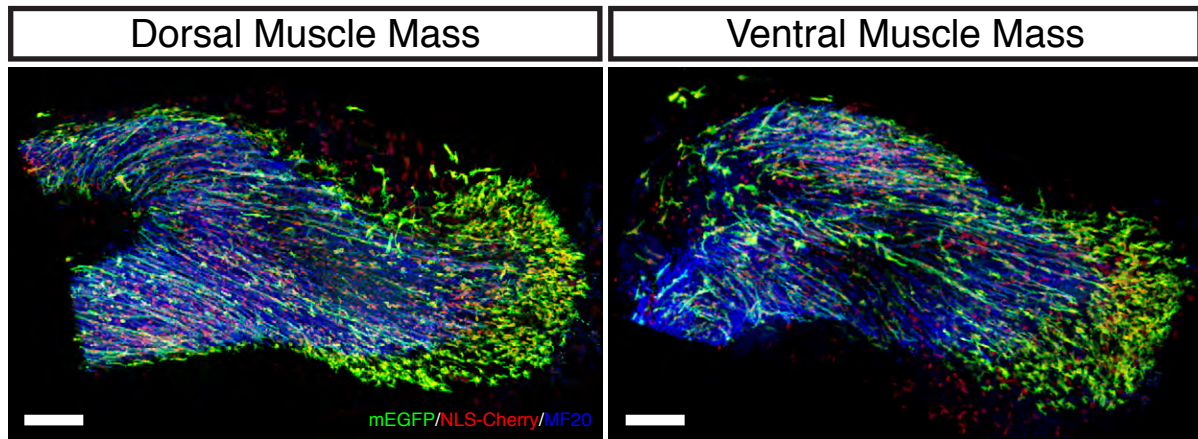

### Supplementary Figure 1.

Dorsal and ventral muscle masses of a single E5.5 chick embryo forelimb co-electroporated at E2.5 in the VLL of somites in the forelimb region with EGFP (in green) and a nuclear form of mCherry (in red). In blue, immuno-staining against MyHC. This shows that the distribution of plurinucleated myofibers is similar in both muscle masses (longest fibers in the central domain, shortest at the periphery), while a cloud of mononucleated progenitors is present at the distal leading edge of both muscle masses.

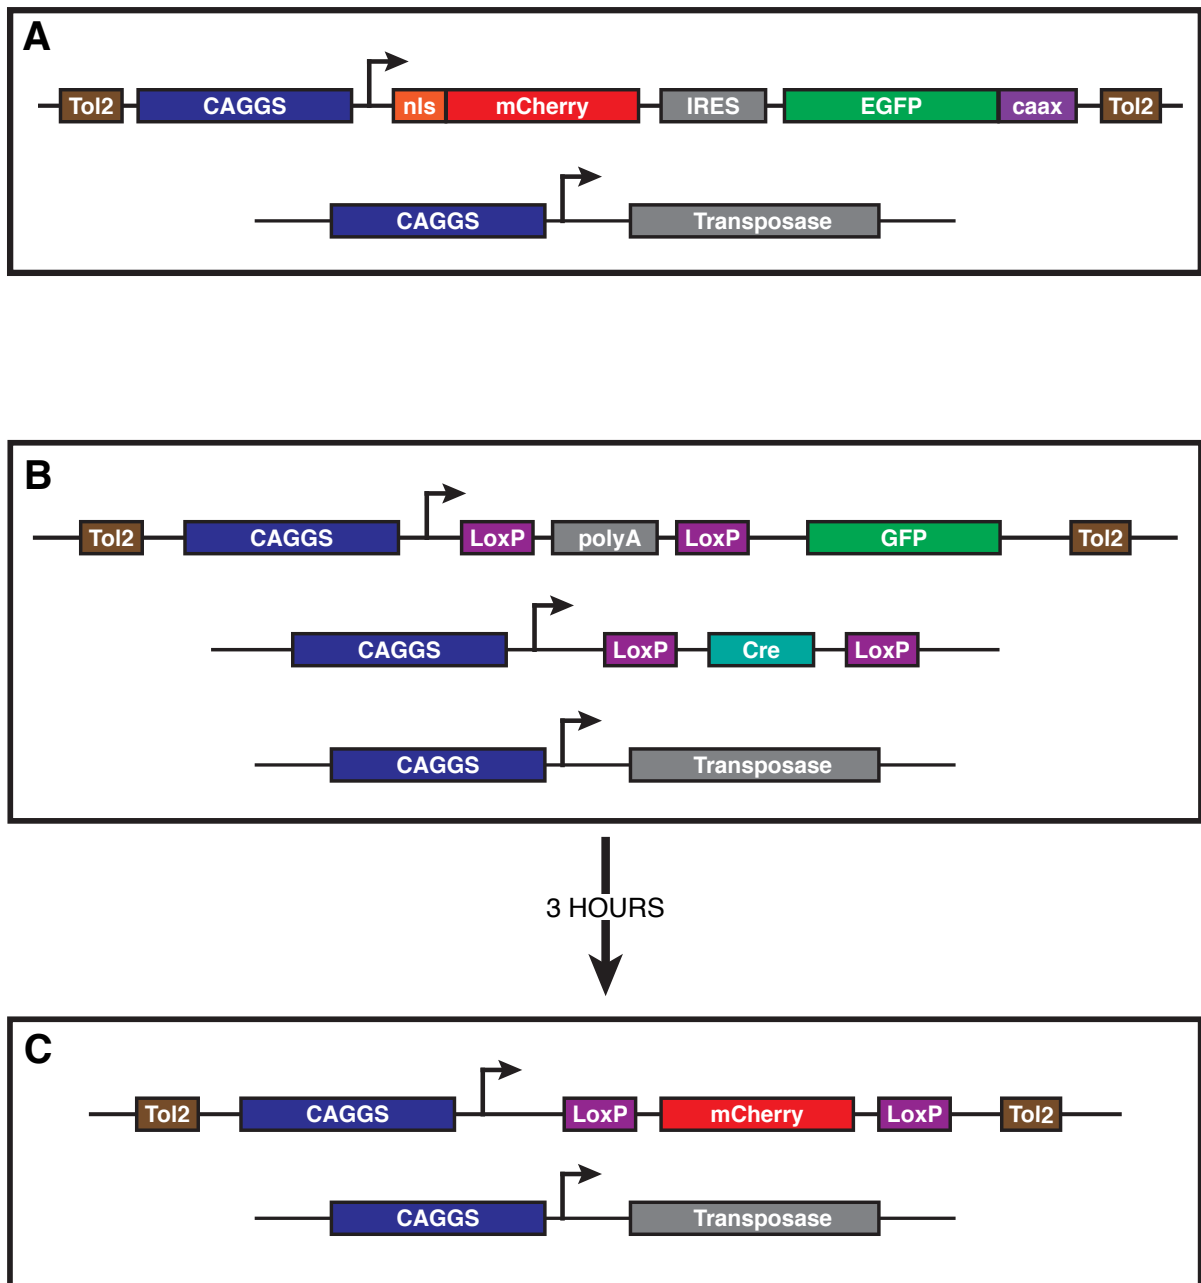

**Supplementary Figure 2.**

(A): Vectors utilized to count the number of nuclei per fiber. (B,C): Description of the double-electroporation protocol aimed at mosaically labelling a cell population with two fluorochromes. B: First co-electroporation with two plasmids, that encode a self-excising Cre and GFP, downstream of a floxed poly(A) signal. When both plasmids are co-expressed, epithelial cells are GFP-positive. If only one plasmid is expressed, cells are not fluorescent. (C): 4 hours later, the DML is electroporated once more with a plasmid encoding a floxed mCherry. DML cells express the mCherry fluorochrome, unless they were previously electroporated with Cre, which inactivates mCherry. The self-excising Cre ensures that the Cre protein is only temporarily present; if mosaically-labeled cells do not fuse, myocytes will be either red or green, if they fuse, a proportion of them will be yellow.

**Supplementary Table 1.**

Count of nuclei per fiber observed at the indicated times after DML, dorsal dermomyotome and limb electroporation.

|                | E3.5  | E4   | E4.5  | E5    | E5.5  | E6 |
|----------------|-------|------|-------|-------|-------|----|
| <b>DML EP</b>  |       |      |       |       |       |    |
|                | n=189 |      | n=353 |       | n=336 |    |
| <b>1N</b>      | 176   |      | 265   |       | 68    |    |
| <b>2N</b>      | 12    |      | 75    |       | 98    |    |
| <b>3N</b>      | 1     |      | 10    |       | 80    |    |
| <b>4N</b>      |       |      | 3     |       | 44    |    |
| <b>5N</b>      |       |      |       |       | 33    |    |
| <b>6N</b>      |       |      |       |       | 11    |    |
| <b>7N</b>      |       |      |       |       | 2     |    |
| <b>Mean</b>    | 1.1   |      | 1.3   |       | 2.8   |    |
| <b>Dm EP</b>   |       |      |       |       |       |    |
|                |       |      | n=186 |       | n=223 |    |
| <b>1N</b>      |       |      | 80    |       | 40    |    |
| <b>2N</b>      |       |      | 71    |       | 54    |    |
| <b>3N</b>      |       |      | 24    |       | 58    |    |
| <b>4N</b>      |       |      | 10    |       | 41    |    |
| <b>5N</b>      |       |      | 1     |       | 21    |    |
| <b>6N</b>      |       |      |       |       | 7     |    |
| <b>7N</b>      |       |      |       |       | 1     |    |
| <b>8N</b>      |       |      |       |       | 1     |    |
| <b>Mean</b>    |       |      | 1.8   |       | 2.9   |    |
| <b>LIMB EP</b> |       |      |       |       |       |    |
|                | n=115 | n=59 | n=207 | n=238 | n=128 |    |
| <b>1N</b>      | 103   | 47   | 37    | 4     | 6     |    |
| <b>2N</b>      | 9     | 11   | 50    | 21    | 7     |    |
| <b>3N</b>      | 3     | 1    | 30    | 24    | 9     |    |
| <b>4N</b>      |       |      | 32    | 31    | 15    |    |
| <b>5N</b>      |       |      | 15    | 25    | 15    |    |
| <b>6N</b>      |       |      | 15    | 36    | 14    |    |
| <b>7N</b>      |       |      | 11    | 25    | 12    |    |
| <b>8N</b>      |       |      | 4     | 18    | 9     |    |
| <b>9N</b>      |       |      | 5     | 21    | 7     |    |
| <b>10N</b>     |       |      | 3     | 12    | 7     |    |
| <b>11N</b>     |       |      | 1     | 8     | 12    |    |
| <b>12N</b>     |       |      |       | 2     | 12    |    |
| <b>13N</b>     |       |      |       | 1     | 2     |    |
| <b>14N</b>     |       |      |       |       | 1     |    |
| <b>15N</b>     |       |      |       | 1     | 1     |    |
| <b>16N</b>     |       |      | 1     | 1     |       |    |
| <b>17N</b>     |       |      |       |       |       | 1  |
| <b>Mean</b>    | 1.1   | 1.2  | 3.6   | 6.1   | 6.7   |    |

**Supplementary Table 2.**

GFP (green), mCherry (red) and mixed (yellow) fibers after electroporation of the indicated somite sub-populations.

|                               |              |            |               |  |
|-------------------------------|--------------|------------|---------------|--|
| <b>DML/DML 10hpe no Cre</b>   |              |            |               |  |
|                               | <b>Green</b> | <b>Red</b> | <b>Yellow</b> |  |
| <b>Fibers Counted</b>         | 48           | 26         | 101           |  |
| <b>Percentage Mean</b>        | 26.7         | 14.7       | 58.6          |  |
| <b>Standard Deviation</b>     | 8.1          | 6.3        | 13.0          |  |
| <b>DML/DML 10hpe control</b>  |              |            |               |  |
|                               | <b>Green</b> | <b>Red</b> | <b>Yellow</b> |  |
| <b>Fibers Counted</b>         | 226          | 215        | 24            |  |
| <b>Percentage Mean</b>        | 46.9         | 49.7       | 3.4           |  |
| <b>Standard Deviation</b>     | 18.2         | 18.8       | 4.7           |  |
| <b>DML/DML 72hpe</b>          |              |            |               |  |
|                               | <b>Green</b> | <b>Red</b> | <b>Yellow</b> |  |
| <b>Fibers Counted</b>         | 193          | 150        | 49            |  |
| <b>Percentage Mean (Adj.)</b> | 49.7         | 42.2       | 8.2           |  |
| <b>Standard Deviation</b>     | 7.6          | 13.2       | 6.6           |  |
| <b>Dm/Dm 72hpe</b>            |              |            |               |  |
|                               | <b>Green</b> | <b>Red</b> | <b>Yellow</b> |  |
| <b>Fibers Counted</b>         | 83           | 69         | 88            |  |
| <b>Percentage Mean (Adj.)</b> | 36.7         | 30.2       | 33.1          |  |
| <b>Standard Deviation</b>     | 4.6          | 7.3        | 6.4           |  |
| <b>DML/Dm 72hpe</b>           |              |            |               |  |
|                               | <b>Green</b> | <b>Red</b> | <b>Yellow</b> |  |
| <b>Fibers Counted</b>         | 91           | 77         | 28            |  |
| <b>Percentage Mean (Adj.)</b> | 48.0         | 42.7       | 9.3           |  |
| <b>Standard Deviation</b>     | 8.1          | 8.2        | 11.2          |  |
| <b>DML/AL 72hpe</b>           |              |            |               |  |
|                               | <b>Green</b> | <b>Red</b> | <b>Yellow</b> |  |
| <b>Fibers Counted</b>         | 78           | 66         | 42            |  |
| <b>Percentage Mean (Adj.)</b> | 43.3         | 36.6       | 20.1          |  |
| <b>Standard Deviation</b>     | 11.3         | 8.8        | 7.8           |  |
| <b>DML/PL 72hpe</b>           |              |            |               |  |
|                               | <b>Green</b> | <b>Red</b> | <b>Yellow</b> |  |
| <b>Fibers Counted</b>         | 78           | 64         | 38            |  |
| <b>Percentage Mean (Adj.)</b> | 45.1         | 37.1       | 17.8          |  |
| <b>Standard Deviation</b>     | 5.4          | 5.5        | 5.1           |  |
